# Supplementary material
Source: ML conference proceedings conference paper supplement (https://proceedings.neurips.cc/paper_files/paper/2019/hash/5fd0b37cd7dbbb00f97ba6ce92bf5add-Abstract.html)
Supplement: Supplementary file [file 5fd0b37cd7dbbb00f97ba6ce92bf5add-Supplemental.zip]

## Appendix– Deriving the SR-kernel for SR×4 from the SR-kernel for SR×2

We will show that the kernel for a scale factor of 4, i.e.  $k_4$ , can be analytically calculated from  $k_2$ .

### Claim:

Given a kernel  $k_2$ , let  $k_4$  be defined by:

$$I_{LR} * k_4 \downarrow_4 = (I_{LR} * k_2 \downarrow_2) * k_2 \downarrow_2.$$

$$\text{Then, } k_4 = k_2 * k_{2\_dilated}, \quad \text{where } k_{2\_dilated}[n_1, n_2] = \begin{cases} k_2 \left[ \frac{n_1}{2}, \frac{n_2}{2} \right] & n_1, n_2 \text{ even} \\ 0 & \text{else} \end{cases}$$

### Proof:

For simplicity, we will assume 1D signals, but this can be easily generalized to 2D.

Let us define:  $x := I_{LR} * k_2$ .

$$\left\{ (I_{LR} * k_2 \downarrow_2) * k_2 \right\} [n] = \left\{ k_2 * x[2 \cdot] \right\} [n] = \sum_{l=-\infty}^{\infty} \left( k_2[n-l] \cdot x[2l] \right)$$

We can substitute  $m := 2l$  and use Kronecker Delta Comb to enforce  $m$  to be even;

$$= \sum_{l=-\infty}^{\infty} \left( \left( \sum_{m=-\infty}^{\infty} \delta[2l-m] \right) \cdot k_2 \left[ n - \frac{m}{2} \right] \cdot x[m] \right)$$

Assuming both signals are of finite energy, changing the summation order is allowed. Adding  $2n$  does not change the result of the Kronecker Delta Comb;

$$= \sum_{m=-\infty}^{\infty} \left( \left( \sum_{l=-\infty}^{\infty} \delta[2l-m+2n] \cdot k_2 \left[ \frac{1}{2}(2n-m) \right] \right) \cdot x[m] \right)$$

This formulates a convolution;

$$= \left\{ \left( \sum_{l=-\infty}^{\infty} \delta[\cdot + 2l] \cdot k_2 \left[ \frac{\cdot}{2} \right] \right) * x \right\} [2n]$$

The Kronecker Delta Comb zeroizes for odd inputs, we therefore obtain  $k_{2\_dilated}$ ;

$$= \left\{ k_{2\_dilated} * x \right\} [2n]$$

Plug in  $x := I_{LR} * k_2$  and subsample both sides by  $\downarrow_2$

$$(I_{LR} * k_2 \downarrow_2) * k_2 \downarrow_2 = I_{LR} * (k_2 * k_{2\_dilated}) \downarrow_4 \quad \square$$
